# Supplementary material for: What Are the Sociodemographic and Clinical Characteristics and Needs of Mothers Who Access Acute Postpartum Psychiatric Care and Have Children’s Social Care Involvement?
Source: Hindawi journal article supplement (doi:10.1155/2023/6165407), 2023-02-11
Supplement: f1 [file 6165407.f1.docx]

**Supplementary file**

**Table 1. Complete case analysis of factors associated with children’s social care involvement during the acute psychiatric admission**

|  | **Covariate** | **Unadjusted (univariable)** | **P** | **Adjusted**  **(multivariable)*** | **P** |
| --- | --- | --- | --- | --- | --- |
| Maternal | Age | 0.94 (0.90-0.98) | 0.007 | 0.97 (0.91-1.04) | 0.375 |
| background | No higher education | 3.98 (2.23-7.11) | <0.001 | 2.98 (1.25-7.06) | 0.013 |
|  | Childhood trauma  Ethnicity: White  Black  Asian  Mixed  Other | 1.03 (1.02-1.05)  Reference  1.93 (0.77-4.85)  1.52 (0.66-3.51)  1.10 (0.31-3.89)  0.43 (0.09-2.04) | <0.001  0.162  0.331  0.879  0.287 | 1.02 (1.00-1.03)  Reference  1.89 (0.42-8.45)  2.51 (0.71-8.95)  0.61 (0.11-3.41)  0.57 (0.06-5.25) | 0.111  0.408  0.155  0.576  0.621 |
| Relationships | Domestic abuse  Single/no partner | 3.88 (2.20-6.87)  4.02 (2.13-7.59) | <0.001  <0.001 | 2.47 (1.10-5.56)  1.11 (0.40-3.03) | 0.029  0.846 |
| Mental health diagnosis and substance use | Personality disorder  Schizophrenia  Learning disability  Substance use | 5.47 (2.79-10.72)  6.61 (2.09-20.89)  1.96 (0.95-4.05)  3.09 (1.42-6.73) | <0.001  0.001  0.067  0.004 | 3.33 (1.32-8.42)  41.33 (4.47-381.86)  1.01 (0.37-2.78)  2.17 (0.72-6.57) | 0.011  0.001  0.984  0.171 |
| Service use | Prior admissions | 4.15 (2.15-8.00) | <0.001 | 2.60 (0.95-7.13) | 0.062 |

*N=242

**Table 2. Complete case analysis of factors associated with children’s social care involvement at one-year follow-up**

|  | **Covariate** | **Unadjusted (univariable)** | **P** | **Adjusted**  **(multivariable)*** | **P** |
| --- | --- | --- | --- | --- | --- |
| Maternal | Age | 0.94 (0.89-0.99) | 0.029 | 0.98 (0.90-1.06) | 0.609 |
| background | No higher education | 5.77 (2.33-14.28) | <0.001 | 4.23 (1.10-16.22) | 0.035 |
|  | Childhood trauma  Ethnicity: White  Black  Asian  Mixed  Other | 1.04 (1.02-1.05)  Reference  1.27 (0.42-3.78)  0.66 (0.18-2.39)  0.47 (0.06-3.94)  1.23 (0.311-4.88) | <0.001  0.673  0.525  0.486  0.765 | 1.03 (1.01-1.06)  Reference  1.78 (0.31-10.20)  1.00 (0.15-6.49)  0.22 (0.02-2.76)  2.90 (0.41-20.39) | 0.010  0.516  0.966  0.239  0.283 |
| Relationships | Domestic abuse  Single/no partner | 2.43 (1.20-4.95)  6.55 (3.12-13.75) | 0.014  <0.001 | 0.86 (0.27-2.79)  4.62 (1.30-16.44) | 0.807  0.018 |
| Mental health diagnosis and substance use | Personality disorder  Schizophrenia  Learning disability  Substance use | 3.81 (1.80-8.06)  2.88 (1.01-8.17)  3.12 (1.39-6.99)  3.47 (1.49-8.12) | <0.001  0.047  0.006  0.004 | 1.12 (0.33-3.82)  3.06 (0.51-18.50)  1.62 (0.54-4.87)  1.79 (0.49-6.53) | 0.858  0.223  0.391  0.379 |
| Service use | Prior admissions  Re-admission | 2.82 (1.35-5.89)  3.48 (1.78-6.84) | 0.006  <0.001 | 1.92 (0.59-6.20)  2.31 (0.84-6.34) | 0.276  0.104 |

*N=186
